# Supplementary material for: Tuning defects in Cu2O nanostructures via room temperature mechanical pressing: impacts on defect-dependent optical and photoelectrochemical sensing performances
Source: Royal Society of Chemistry journal article supplement (doi:10.1039/d4tc00432a), 2024-01-01
Supplement: d4tc00432a1.pdf [file d4tc00432a1.pdf]

## Supporting Information

### Tuning Defects in Cu<sub>2</sub>O Nanostructure via Room Temperature Mechanical Pressing: Impacts on Defect-Dependant Optical and Photoelectrochemical Sensing Performances

*Yun Cai,<sup>a</sup> Wenyao Zhou,<sup>a</sup> Hongli Wang,<sup>a</sup> Jiajie Bi,<sup>\*ab</sup> Fengjiao Yu,<sup>a</sup> Jun Fang<sup>a</sup> and Yang Yang<sup>\*a</sup>*

<sup>a</sup> State Key Laboratory of Materials-Oriented Chemical Engineering, College of Chemical Engineering, Nanjing Tech University, Nanjing 211816, China

\* Email: [yangy@njtech.edu.cn](mailto:yangy@njtech.edu.cn)

<sup>b</sup> College of Chemistry and Materials Engineering, Wenzhou University, Wenzhou, Zhejiang, 325035, China

\* Email: [bjj@wzu.edu.cn](mailto:bjj@wzu.edu.cn)

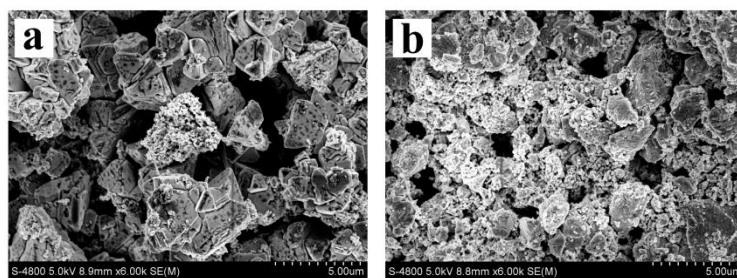

**Fig. S1** SEM images of (a) D-powder and (b) P-powder subjected to the mechanical pressing at a pressure of 0.36 GPa.

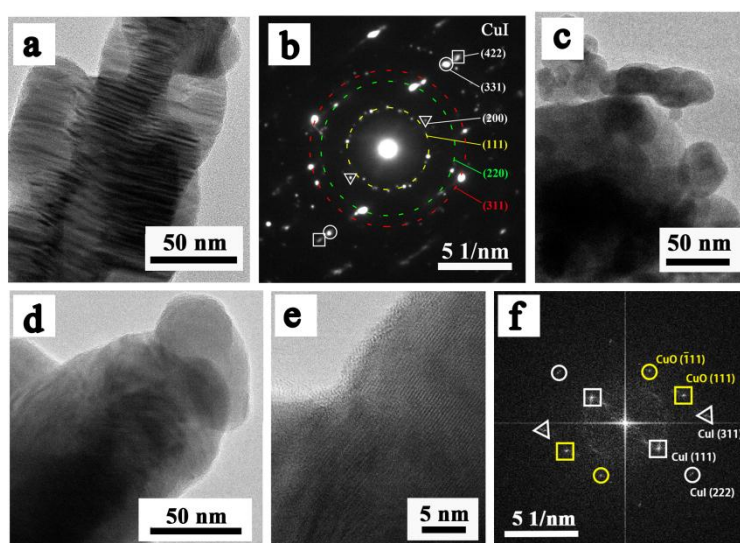

**Fig. S2** (a) TEM image and (b) corresponding SAED pattern of D-powder. (c) TEM image of P-powder. (d) TEM image, (e) HRTEM image and (f) FFT pattern calculated from (e) of A-powder.

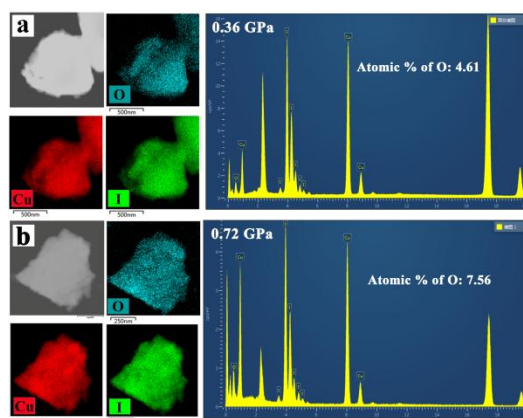

**Fig. S3** STEM images, EDS elemental mapping images and atomic percentages of O of the samples pressed under 0.36 GPa (a) and 0.72 GPa (b).

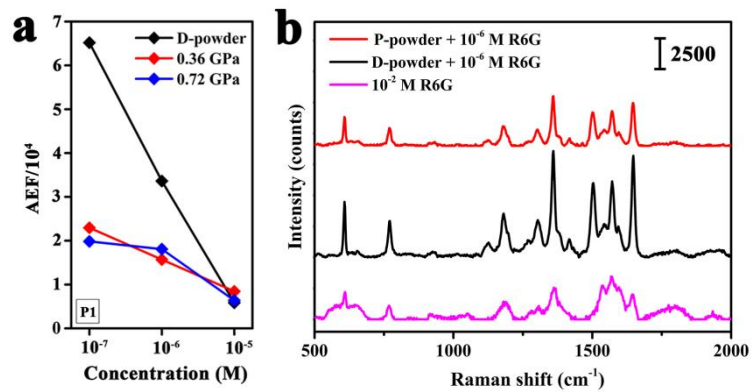

**Fig. S4** (a) Statistical evolution of the analytical enhancement factors (AEFs) as a function of R6G concentration. (b) Raman spectra of R6G at a concentration of  $1.0 \times 10^{-2}$  M collected on a Si wafer and R6G at a concentration of  $1.0 \times 10^{-6}$  M collected on the Si wafer deposited with D-powder and P-powder, respectively.

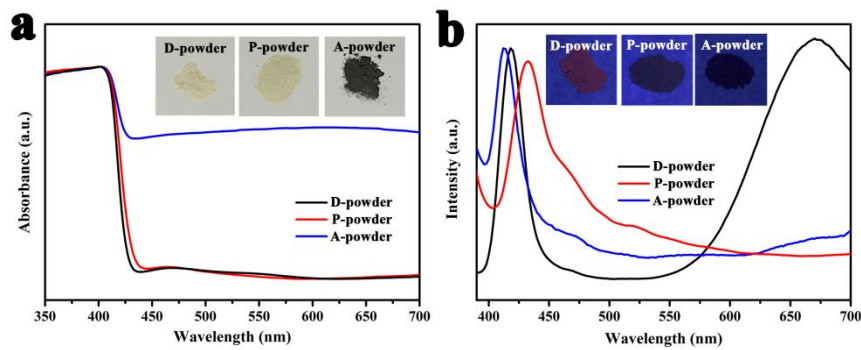

**Fig. S5** (a) UV-vis diffuse reflectance spectra of D-powder, P-powder and A-powder; inset in (a) is the corresponding photographs under natural light. (b) PL spectra of the aforementioned samples acquired with a 365 nm excitation wavelength; inset in (b) is the corresponding fluorescence images under UV lamp (365 nm) irradiation.

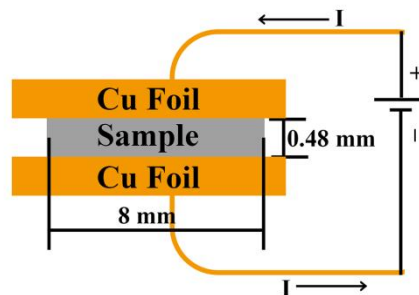

**Fig. S6** Schematic illustration of conductivity measurements.

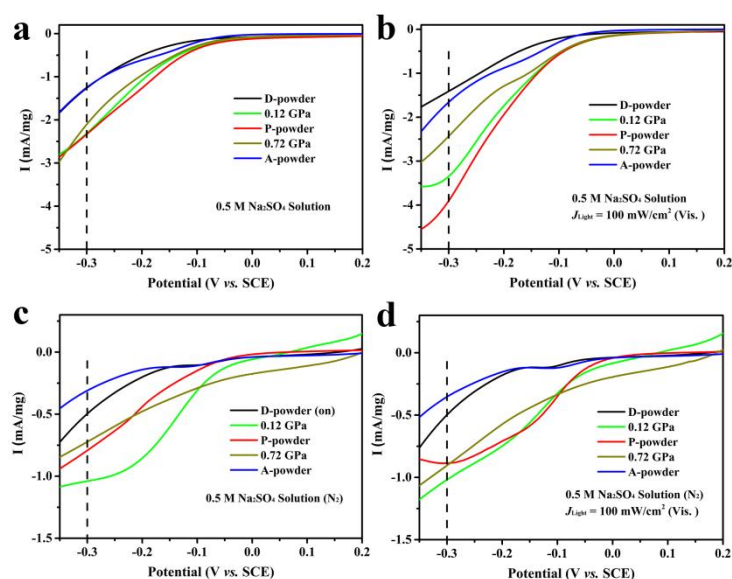

**Fig. S7** Linear sweep voltammograms (LSVs) of the different samples in 0.5 M Na<sub>2</sub>SO<sub>4</sub> solution with dissolved oxygen in dark (a) and under visible light illumination (b), and without dissolved oxygen in dark (c) and under visible light illumination (d).

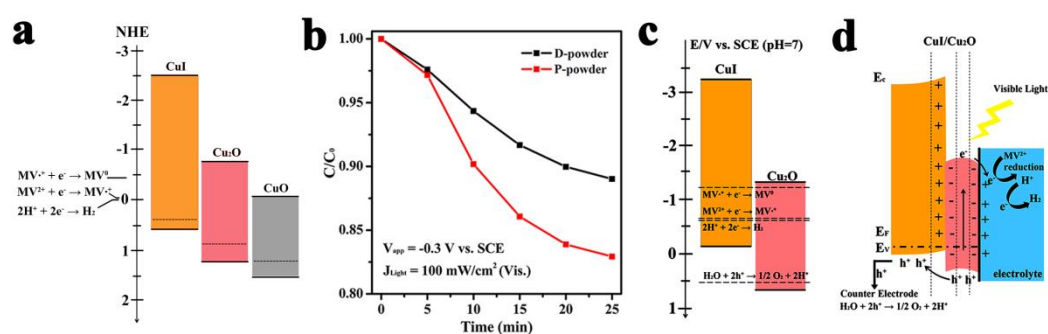

**Fig. S8** (a) Energy levels of CuI, Cu<sub>2</sub>O and CuO. (b) PEC degradation of MVCl<sub>2</sub> (10 μM) by D-powder and P-powder in an oxygen-free environment under visible light. (c) Band alignment of Cu<sub>2</sub>O and CuI before equilibration. (d) Schematic illustration of PEC reduction reactions catalyzed by P-powder in an oxygen-free environment under visible light illumination.
